# Supplementary material
Source: PubMed Central journal article supplement (PMC3964355)
Supplement: 10-1055-s-0033-1351073-sup_gf712.pdf [file 10-1055-s-0033-1351073-sup_gf712.pdf]

# Die Wirkung des suburethralen Bandes auf die Symptome der überaktiven Harnblase

## The Effects of Suburethral Tape on the Symptoms of Overactive Bladder

## Autoren

G. Hensel, M. Košťál, J. Göbel

## Institut

Klinik für Gynäkologie und Geburtshilfe, Pardubická krajská nemocnice, a.s., Pardubice, Czech Republic

## Schlüsselwörter

- Harninkontinenz
- Urodynamik
- überaktive Harnblase
- suburethrales Band

## Key words

- urinary incontinence
- urodynamics
- overactive bladder
- suburethral sling

## Zusammenfassung

Das spannungsfreie suburethrale Vaginalband wird zur Behandlung der Belastungsinkontinenz mit hohen Erfolgsraten eingesetzt. Oft berichten Patientinnen mit Belastungsinkontinenz aber auch von gleichzeitig bestehenden Miktionsproblemen, die dem Syndrom der überaktiven Harnblase (engl. overactive bladder – OAB) zuzuordnen sind. Die vorliegende Studie prüft die Wirkung des suburethralen Bandes auf die Symptome der OAB. In der Studie verwendeten wir ein transobturatorisch geführtes Band in der Inside-out-Technik (TVT-O).

**Material und Methoden:** In die Studie wurden 53 Patientinnen eingebracht, die alle außer einer urodynamisch nachgewiesenen Belastungsinkontinenz Symptome der überaktiven Harnblase aufwiesen. Die Patientinnen wurden präoperativ und 3 Monate nach Implantation von TVT-O untersucht.

**Ergebnisse:** Die einzelnen OAB-Symptome verbesserten sich signifikant, Dranginkontinenz und Pollakisurie mehr als Nykturie. Die Miktionsfrequenz sank im Mittel von 16,1 auf 10,1 Miktionen/24 Stunden, die nächtliche Miktionsfrequenz von 2,2 auf 1,1. Bei keiner einzigen Patientin kam es zur gleichzeitigen Verschlechterung aller 3 gemessenen Parameter, dafür jedoch bei 19% der Patientinnen zu ihrem gleichzeitigen Verschwinden. Die durch die OAB beeinträchtigte Lebensqualität verbesserte sich signifikant, was anhand von validierten Fragebögen gemessen wurde. Nur 28% der Patientinnen gaben nach Bandeinlage noch den Wunsch nach medikamentöser Behandlung der OAB-Symptome an.

**Schlussfolgerungen:** Die Implantation von TVT-O führt zur signifikanten Verbesserung der Symptome der überaktiven Harnblase. Auch die durch die OAB beeinträchtigte Lebensqualität wird durch die Bandimplantation gesteigert, was einen we-

## Abstract

Suburethral tension-free vaginal tape is used for the treatment of stress urinary incontinence with a high success rate. Often patients report having stress incontinence, as well as co-existing micturition problems which are attributable to overactive bladder syndrome (OAB). The present study examines the effect of suburethral tape on the symptoms of OAB. In the study, we used the transobturator vaginal tape inside-out technique (TVT-O).

**Materials and Methods:** 53 patients were included in the study, all had proven urodynamic stress incontinence and symptoms of overactive bladder. The patients were examined preoperatively and 3 months after the TVT-O placement.

**Results:** The individual OAB symptoms improved significantly, with urinary frequency and urge incontinence improving more than nocturia. The frequency of micturition decreased on average from 16.1 to 10.1 episodes/24 hours, while nocturnal frequency of micturition decreased from 2.2 to 1.1. Not a single patient experienced the simultaneous worsening of all three measured variables, however 19% of patients did report their simultaneous disappearance. Their quality of life that had been affected by OAB was measured on the basis of validated questionnaires, and found to have improved significantly. Only 28% of patients reported a desire for drug treatment of OAB symptoms following tape placement.

**Conclusions:** TVT-O placement leads to a significant improvement of the symptoms of overactive bladder syndrome. Patient quality of life – which was affected by OAB – was also enhanced by the tape placement. This accounts for a substantial share of the overall success of the suburethral tape.

**eingereicht** 17.12.2012  
**revidiert** 22.5.2013  
**akzeptiert** 11.10.2013

## Bibliografie

**DOI** <http://dx.doi.org/10.1055/s-0033-1351073>  
 Online-publiziert 21.1.2014  
 Geburtsh Frauenheilk 2014; 74:  
 1–6 © Georg Thieme Verlag KG  
 Stuttgart · New York ·  
 ISSN 0016-5751

## Korrespondenzadresse

**Dr. Germund Hensel**  
 Pardubická krajská nemocnice,  
 a.s.  
 Klinik für Gynäkologie  
 und Geburtshilfe  
 Kyjevská 44  
 53203 Pardubice  
 Czech Republic  
[germund.hensel@seznam.cz](mailto:germund.hensel@seznam.cz)

sentlichen Anteil am allgemeinen Erfolg des suburethralen Bandes ausmachen dürfte.

## Einleitung

Die Implantation des suburethralen Bandes geschieht weltweit und mit viel Erfolg zur Behandlung der Belastungsinkontinenz. In vielen Fällen ist jedoch bei genauer anamnestischer Exploration die Belastungsinkontinenz nicht das einzige Miktionsproblem der Patientin. Oft kommen Symptome der überaktiven Harnblase hinzu, die imperativen Harndrang, Pollakisurie, Nykturie und fakultativ Dranginkontinenz umfassen. Besteht die Kombination von Belastungs- und Dranginkontinenz, so liegt nach Definition der internationalen Kontinenzgesellschaft (ICS) eine Mischinkontinenz vor [1], die nach Dooley et al. [2] eine Prävalenz von 30% aller Frauen mit Harninkontinenz erreicht und die Patientin mehr belastet als eine reine Belastungsinkontinenz [3].

Mehrere Studien haben sich bereits mit der Frage beschäftigt, ob bei Mischinkontinenz eine operative Therapie indiziert werden kann. Diese Frage wird mittlerweile mit ja beantwortet [4–6], wenn auch eine niedrigere Heilungsrate zu erwarten ist als bei reiner Belastungsinkontinenz [4]. Abdel-fattah [7] gibt eine subjektive Zufriedenheit von 75% aller Patientinnen mit Mischinkontinenz 1 Jahr nach Bandimplantation an. In einer Metaanalyse gibt Jain [8] eine Heilungsrate bez. der Dranginkontinenzkomponente von 30–85% nach Bandimplantation an. Kissling [6] weist nach, dass die Bandimplantation bei Mischinkontinenz mit prädominanter Dranginkontinenzkomponente der medikamentösen Therapie mit einem Anticholinergikum überlegen ist. Wie sehr beeinflusst die Bandimplantation neben der Dranginkontinenz aber auch die anderen o.g. einzelnen Symptome der überaktiven Blase? Dass auch diese durch die Bandimplantation signifikant verbessert werden, wird durch Athanasiou [9] beschrieben. Abdel-fattah [7] gibt eine Heilungsrate bez. imperativen Harndrangs von 52% an, Palva und Nilsson [10] eine Heilungsrate der Pollakisurie von 61%. Nur 16–26% der Patientinnen wünschen nach Bandimplantation noch eine medikamentöse Behandlung mit Antimuskarinika [11, 12].

Die vorliegende Studie soll mehr Klarheit darüber bringen, in welchem Maß die einzelnen präoperativ bestehenden Symptome der überaktiven Blase gelindert bzw. geheilt werden und wie sehr die damit zusammenhängende Lebensqualität durch die Implantation eines suburethralen Bandes verbessert wird.

## Material und Methodik

Die vorliegende Studie ist eine prospektive klinische Longitudinalstudie. Es wird die Veränderung von Miktionsparametern und Fragebogenscores gemessen, dies jeweils mit Bezug auf die Symptome der überaktiven Blase. Da die Studie den Charakter einer Beobachtungsstudie hat und die Indikation zur Therapie (Bandimplantation) bei allen Patientinnen aufgrund einer nachgewiesenen Belastungsinkontinenzkomponente gestellt wurde, wurde ein Ethikkommissions-Votum nicht benötigt.

## Patientenkollektiv

Die prospektive Beobachtungsstudie wurde von Juni 2010 bis Juni 2012 an der Klinik für Gynäkologie und Geburtshilfe im Bezirkskrankenhaus Pardubice (Pardubická krajská nemocnice, a. s.)

in der Tschechischen Republik durchgeführt. Dabei untersuchten wir 78 Patientinnen, für welche die Einschlusskriterien „urodynamisch nachgewiesene Belastungsinkontinenz“ und „gleichzeitig bestehende Symptome der überaktiven Blase“ zutrafen. Alle 78 Patientinnen wiesen Dranggefühl, Pollakisurie (> 8 Miktionen/Tag) und Nykturie auf, ein Teil von ihnen zusätzlich noch das Symptom Dranginkontinenz. Die Patientinnen stimmten einer operativen Therapie zu und erhielten alle das Transobturatorband in Inside-out-Technik (TVT-O). Für die Studie galten folgende Ausschlusskriterien: neurogene Blase (1 Patientin), Zustand nach Antiinkontinenzoperation (2 Patientinnen), zeitgleiche Durchführung einer weiteren Operation wie Hysterektomie oder Scheidenplastik (22 Patientinnen). Somit konnten letztlich 53 Patientinnen in die Studie eingebracht werden.

## Eingangsuntersuchung

Die präoperative Eingangsuntersuchung umfasste die urogynäkologische Anamnese, das Führen eines Miktionsstagebuchs über mindestens 2 × 24 Stunden, die gynäkologische Untersuchung, Urinuntersuchung, urodynamische Untersuchung, Ultraschall sowie das Ausfüllen der beiden Fragebögen ICIQ-OAB und ICIQ-OABqol in tschechischer Sprache. ICIQ-OAB ist ein validierter Fragebogen, der mithilfe von 4 Fragen die Ausprägung der OAB-Symptome (Pollakisurie, Nykturie, imperativer Harndrang und Dranginkontinenz) misst und mittels Analogskala den durch diese verursachten Leidensdruck ermittelt. ICIQ-OABqol misst mithilfe von 26 Fragen den Einfluss der OAB-Symptome auf die Lebensqualität. Übersicht der ICIQ-Fragebögen s.u. [www.iciq.net](http://www.iciq.net). Beide benutzten Fragebögen werden in einem Übersichtsartikel von V. Khullar ausdrücklich zum Gebrauch im Rahmen von wissenschaftlichen Studien empfohlen [13].

## Bandeinlage und Kontrolluntersuchung

Alle Patientinnen erhielten das TVT-O-Band (Transobturatorband in Inside-out-Technik, Fa. Ethicon). Drei Monate postoperativ erfolgte die Kontrolluntersuchung: Miktionsstagebuch über 2 Tage, Frage nach Dranginkontinenz, Restharnultraschall, Ausfüllen der beiden Fragebögen ICIQ-OAB und ICIQ-OABqol sowie Befragung hinsichtlich des Wunsches nach medikamentöser Behandlung der OAB-Symptome.

## Statistische Analyse

Von Heilung bez. eines Symptoms sprachen wir, wenn dieses nach Bandimplantation nicht mehr auftrat, so ein verschwundener imperativer Harndrang, eine Miktionsfrequenz von weniger als 9 Miktionen pro 24 Stunden, kein nächtlicher Toilettengang mehr, keine Dranginkontinenzepisode mehr. Dementsprechend wurde als Besserung die verminderte Frequenz dieser Symptome bezeichnet. Dabei wurde Heilung und Besserung rein deskriptiv angegeben, ebenso erfolgte die Darstellung der Fragebogenscores vor und nach Bandimplantation deskriptiv. Für den Vergleich der Miktionsfrequenzen sowie den Vergleich der Fragebogen-Gesamtscores vor und nach Bandimplantation wurde der t-Test für verbundene Stichproben angewandt. Alle Analysen wurden mit den Statistikfunktionen des Programms Microsoft Excel durchgeführt. P-Werte < 0,05 galten als statistisch signifikant.

## Ergebnisse

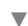

### Parameter der Eingangsuntersuchung

● **Tab. 1** zeigt die anamnestischen Patientendaten; diese umfassen außer Alter, Body-Mass-Index und Dauer der Beschwerden auch chirurgische und medikamentöse Vorbehandlungen, die Geburtenanamnese und Risikofaktoren.

● **Tab. 2** gibt eine Übersicht von Untersuchungsbefunden nach klinischer Exploration, urodynamischer Untersuchung und Ultraschall. Diese beziehen sich alle auf den Zustand vor der Bandimplantation.

### Auswertung der Miktionstagebücher

Die Bandimplantation führte gemäß Erfassung im Miktionstagebuch bei 22 Patientinnen (41,5%) zur Senkung der Miktionsfrequenz auf 8 Miktionen und weniger pro 24 Stunden, somit kann bei ihnen von Heilung in Bezug auf Pollakisurie gesprochen werden (● **Tab. 3**). Bei weiteren 23 Patientinnen (43,4%) kam es zur Besserung der Pollakisurie. Nykturie verschwand nur bei 12 Patientinnen (22,6%) völlig, bei weiteren 23 Patientinnen (43,4%) kam es zur Besserung. Am größten war der Prozentsatz der Heilung in Bezug auf das Symptom Dranginkontinenz, das 83,9%

nach Bandimplantation verneinten. Nimmt man alle 3 genannten Symptome zusammen, so kam es bei 10 Patientinnen (18,9%) zum gleichzeitigen Verschwinden aller Symptome, eine gleichzeitige Verschlechterung von allen 3 Symptomen trat in keinem einzigen Fall auf.

**Tab. 1** Anamnestische Patientendaten.

| anamnestische Angabe                     | Anzahl Patientinnen | %    |
|------------------------------------------|---------------------|------|
| <b>Alter</b>                             |                     |      |
| ▶ 0–50                                   | 14                  | 26,4 |
| ▶ 51–70                                  | 31                  | 58,5 |
| ▶ > 70                                   | 8                   | 15,1 |
| <b>BMI</b>                               |                     |      |
| ▶ < 25,0                                 | 13                  | 25,0 |
| ▶ 25,0–35,0                              | 34                  | 65,4 |
| ▶ > 35,0                                 | 5                   | 9,6  |
| ▶ k. A.                                  | 1                   |      |
| <b>Dauer der Beschwerden (in Jahren)</b> |                     |      |
| ▶ < 1                                    | 3                   | 5,6  |
| ▶ 1–5                                    | 36                  | 67,9 |
| ▶ > 5                                    | 14                  | 26,4 |
| ▶ durchschnittlich                       | 4,92                |      |
| <b>Voroperationen</b>                    |                     |      |
| ▶ Hysterektomie                          | 13                  | 24,5 |
| ▶ vordere Scheidenplastik                | 1                   | 1,9  |
| ▶ keine                                  | 39                  | 73,6 |
| <b>Anticholinergika anamnestisch</b>     |                     |      |
| ▶ subjektiv ohne Effekt                  | 8                   | 15,1 |
| ▶ subjektiv mit Effekt                   | 2                   | 3,8  |
| ▶ subjektiv mit vorübergeh. Effekt       | 12                  | 22,6 |
| ▶ keine                                  | 31                  | 58,5 |
| <b>Geburtenanamnese</b>                  |                     |      |
| ▶ vaginal spontan                        | 52                  | 98,1 |
| ▶ vaginal-operativ (Forceps)             | 1                   | 1,9  |
| <b>Parität</b>                           |                     |      |
| ▶ 1                                      | 6                   | 11,3 |
| ▶ 2                                      | 37                  | 69,8 |
| ▶ 3                                      | 7                   | 13,2 |
| ▶ 4                                      | 3                   | 5,7  |
| Einnahme von Antidepressiva              | 12                  | 22,6 |
| Diabetes mellitus                        | 6                   | 11,3 |
| Asthma bronchiale                        | 10                  | 18,9 |
| Nikotinabusus                            | 11                  | 20,8 |
| Obstipation                              | 13                  | 24,5 |
| Harnwegsinfekt > 2×/Jahr                 | 6                   | 11,3 |

**Tab. 2** Patientendaten gemäß klinischer Untersuchung, Urodynamik, Ultraschall.

| Untersuchungsparameter              | Anzahl Patientinnen | %    |
|-------------------------------------|---------------------|------|
| <b>Deszensus</b>                    |                     |      |
| ▶ keiner                            | 39                  | 73,6 |
| ▶ geringe Zystozele                 | 9                   | 17,0 |
| ▶ geringe Rektozele                 | 5                   | 9,4  |
| <b>erster Harndrang</b>             |                     |      |
| ▶ < 150 ml                          | 11                  | 22,0 |
| ▶ > 150 ml                          | 39                  | 78,0 |
| keine Angabe                        | 3                   |      |
| <b>totale Blasenkapazität</b>       |                     |      |
| ▶ < 350 ml                          | 14                  | 26,4 |
| ▶ > 350 ml                          | 39                  | 73,6 |
| nachgewiesene Detrusorkontraktionen | 2                   | 3,8  |
| hypotone Urethra (ISD)*             | 10                  | 18,3 |
| <b>Qmax</b>                         |                     |      |
| ▶ < 15 ml/s                         | 3                   | 5,8  |
| ▶ > 15 ml/s                         | 49                  | 94,2 |
| ▶ keine Angabe                      | 1                   |      |
| <b>Restharn</b>                     |                     |      |
| ▶ 0–10 ml                           | 33                  | 62,3 |
| ▶ 11–20 ml                          | 9                   | 17,0 |
| ▶ 21–30 ml                          | 6                   | 11,3 |
| ▶ 31–40 ml                          | 4                   | 7,5  |
| ▶ > 40 ml                           | 1                   | 1,9  |
| Urethrahypermobilität               | 47                  | 88,7 |

\* ISD = Intrinsic Sphincter Deficiency gemäß internationaler Guidelines [14, 15]

**Tab. 3** Veränderungen der einzelnen Symptome 3 Monate nach Bandimplantation.

| Symptom                                                                                          | Veränderung                 | Anzahl Patientinnen | %    |
|--------------------------------------------------------------------------------------------------|-----------------------------|---------------------|------|
| Pollakisurie                                                                                     | geheilt                     | 22                  | 41,5 |
|                                                                                                  | gebessert                   | 23                  | 43,4 |
|                                                                                                  | gleich                      | 7                   | 13,2 |
|                                                                                                  | verschlechtert              | 1                   | 1,9  |
| Nykturie                                                                                         | geheilt                     | 12                  | 22,6 |
|                                                                                                  | gebessert                   | 23                  | 43,4 |
|                                                                                                  | gleich                      | 12                  | 22,6 |
|                                                                                                  | verschlechtert              | 6                   | 11,3 |
| Dranginkontinenz                                                                                 | geheilt                     | 26                  | 83,9 |
|                                                                                                  | gebessert                   | 0                   | 0    |
|                                                                                                  | gleich                      | 2                   | 6,5  |
|                                                                                                  | verschlechtert              | 3                   | 9,7  |
|                                                                                                  | (ohne Dranginkontinenz: 22) |                     |      |
| Patientinnen ohne Pollakisurie, noch Nykturie, noch Dranginkontinenz                             |                             | 10                  | 18,9 |
| Patientinnen mit gleichzeitiger Verschlechterung von Pollakisurie, Nykturie und Dranginkontinenz |                             | 0                   | 0    |

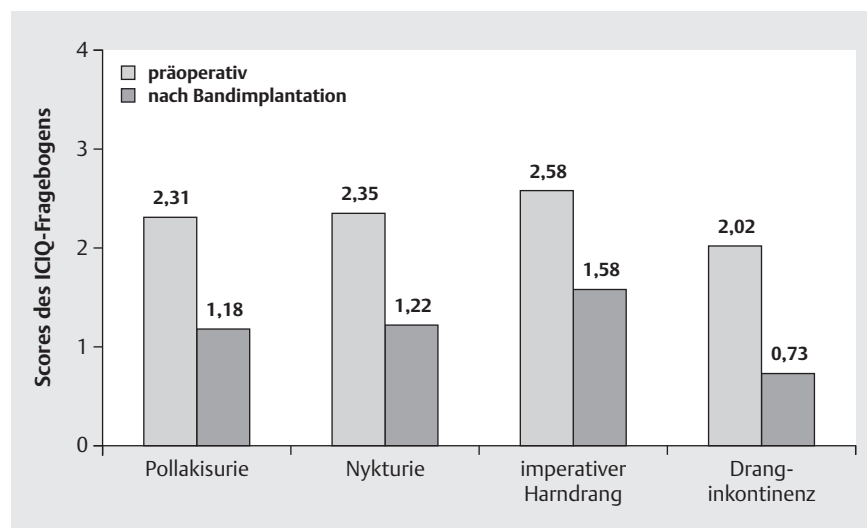

**Abb. 1** Fragebogen ICIQ-OAB: Scores für das jeweilige Symptom vor und nach Bandimplantation (Scoreverteilung für das jeweilige Symptom von 0–4).

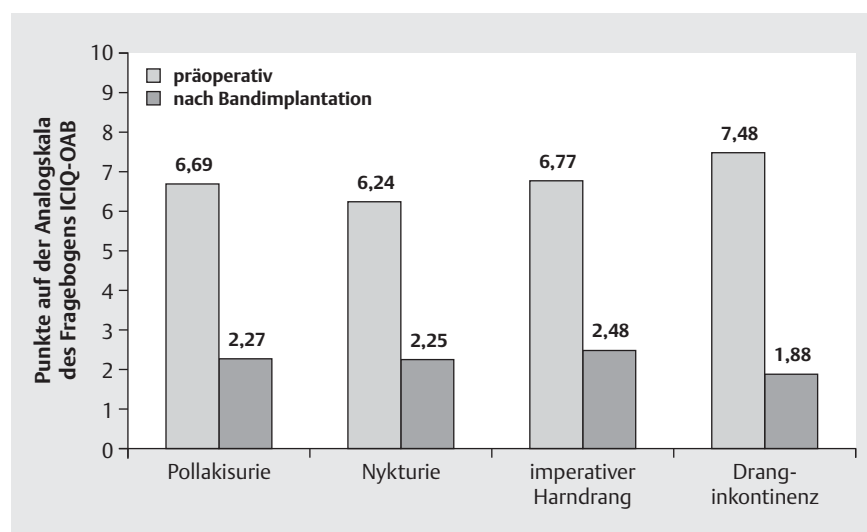

**Abb. 2** Fragebogen ICIQ-OAB: Leidensdruck durch das jeweilige Symptom vor und nach Bandimplantation (Analogskala 0 ... 10).

Die Aufzeichnungen im Miktionstagebuch erlauben auch, bezogen auf die gesamte Patientengruppe, die Errechnung eines Durchschnittswerts der Miktionen pro 24 Stunden bzw. pro Nacht und deren Vergleich vor und nach Bandimplantation (● **Tab. 4**). Vor Bandimplantation betrug die durchschnittliche Miktionsfrequenz 16,09 Miktionen/24 h bzw. 2,16 Miktionen/Nacht, diese sank 3 Monate nach Bandimplantation auf 10,12 Miktionen/24 h bzw. 1,07 Miktionen/Nacht. Die Verringerung beider Werte ist statistisch signifikant ( $p < 0,001$ ).

### Auswertung der Fragebögen

Auf dem Fragenbogen ICIQ-OAB mussten die Patientinnen Angaben zur Ausprägung der verschiedenen Symptome der überaktiven Blase machen. Die Durchschnittsscores vor und nach Bandimplantation zeigt ● **Abb. 1**. Das durchschnittlich am stärksten ausgeprägte Symptom ist der imperative Harndrang (Durchschnittsscore vor Bandimplantation 2,58, nach Bandimplantation noch immer 1,58). Bei sämtlichen Symptomen kommt es im Durchschnitt zur Verbesserung, am deutlichsten fällt die Verbesserung in Bezug auf die Dranginkontinenz aus (Score Differenz 1,29).

**Tab. 4** Veränderung der Miktionsparameter.

| Miktionsparameter     | vor Bandimplantation | nach Bandimplantation | p-Wert  |
|-----------------------|----------------------|-----------------------|---------|
| Miktionsfrequenz/24 h | 16,09 (SD 4,97)      | 10,12 (SD 4,15)       | < 0,001 |
| Nykturie              | 2,16 (SD 1,82)       | 1,07 (SD 0,96)        | < 0,001 |

● **Abb. 2** gibt ein weiteres Ergebnis des Fragebogens ICIQ-OAB wieder. Die Patientinnen wurden in Bezug auf jedes Symptom gefragt, wie sehr sie das Symptom stört. Der subjektive Leidensdruck musste mit einer Zahl auf einer Skala von 0 bis 10 angegeben werden. Den höchsten Leidensdruck verursacht demnach das Symptom „Dranginkontinenz“ (Durchschnittswert 7,48 auf der genannten Skala), gefolgt vom „imperativen Harndrang“ (Durchschnittswert 6,77). Die größte Differenz der Leidensdruckwerte, d. h. die größte Verbesserung fand sich hier erneut für die Dranginkontinenz (Punktdifferenz 5,6).

Aus den beiden Fragebögen ICIQ-OAB und ICIQ-OABqol wurde ein Gesamtscore ermittelt und ein Vergleich desselben vor und

**Tab. 5** Gesamtscores der jeweiligen Fragebogen (Gesamtscoreverteilung für ICIQ-OAB von 0–12, für ICIQ-OABqol von 25,150).

| Fragebogen  | vor Band-<br>implantation | nach Band-<br>implantation | p-Wert  |
|-------------|---------------------------|----------------------------|---------|
| ICIQ-OAB    | 9,25                      | 4,5                        | < 0,001 |
| ICIQ-OABqol | 77,4                      | 44,2                       | < 0,001 |

nach Therapie angestellt (● **Tab. 5**). Er sank von durchschnittlich 9,25 vor Bandimplantation im ICIQ-OAB auf 4,5 nach Bandimplantation, für den ICIQ-OABqol betragen diese Werte 77,4 vor und 44,2 nach Bandimplantation. Für beide Fragebögen sank der Gesamtscore statistisch signifikant ( $p < 0,001$ ).

### Bedarf an medikamentöser Behandlung der OAB nach Bandimplantation

Schließlich wurden sämtliche Patientinnen bei der Kontrolluntersuchung 3 Monate nach Bandimplantation danach gefragt, ob sie für die ggf. noch bestehenden Symptome der überaktiven Harnblase noch eine medikamentöse Behandlung wünschten. Diesen Wunsch gaben 15 Patientinnen (28,3%) an.

### Diskussion

Dass das suburethrale Band zur Besserung bzw. Heilung der Belastungsinkontinenz mit viel Erfolg eingesetzt wird, ist allseits bekannt [16]. Der Effekt auf die Sphinkterschwäche ist durch viele Studien ausreichend belegt. Unsere Studie widmet sich allerdings nicht den Parametern der Belastungsinkontinenz, sondern den Symptomen der hyperaktiven Blase, die zusätzlich zur Belastungsinkontinenz bei allen eingebrachten Patientinnen bestanden. In vielen Studien wird diese häufige Begleitsymptomatik nicht oder nicht ausreichend beachtet.

Die präoperativ bei allen in die Studie aufgenommenen Patientinnen bestehenden Symptome der überaktiven Harnblase wurden gemäß der dargestellten Ergebnisse signifikant gemildert. Der durch die Miktionsprobleme ausgelöste Leidensdruck sank nach Bandimplantation ebenfalls signifikant. In einigen Fällen führte die Bandimplantation zur Verschlechterung eines einzelnen Symptoms der hyperaktiven Blase, aber in keinem Fall zur Verschlechterung aller gemessenen Parameter gleichzeitig.

Was die einzelnen Komponenten der überaktiven Harnblase angeht, so konnten Pollakisurie und Dranginkontinenz jeweils in 85 bzw. 84% gebessert bzw. geheilt werden, die größte positive Veränderung war bei der Dranginkontinenz zu verzeichnen, was übereinstimmend von Abdel-fattah et al. berichtet worden ist [7]. Eine Besserung bzw. Heilung der Nykturie hingegen konnte nur in 67% erzielt werden. Dies ist mit Sicherheit durch den Einfluss der nächtlichen Polyurie zu erklären [17, 18], d. h. durch eine vermehrte Harnproduktion in den Nachtstunden, die selbstverständlich nicht durch eine Manipulation am unteren Harntrakt beeinflusst werden kann.

Wie kann man sich den positiven Einfluss des suburethralen Bandes auf die Symptome der überaktiven Harnblase erklären? Perucchini und Schär schreiben dem Harneintritt in die proximale Urethra bei sog. Trichterbildung das Auslösen eines Dranggefühls zu [5, 19, 20], das Eliminieren des Urethratrichters durch die Bandimplantation könnte somit auch zur Behebung des Harn-drangs führen [21]. Eine weitere Hypothese der „urethrogenen Detrusorüberaktivität“ besagt, dass in bestimmten Fällen der De-

trusorüberaktivität eine urethrale Erschlaffung vorausgeht, Patientinnen mit dieser Störung würden besser auf eine operative Behandlung und weniger auf eine medikamentöse Antimuskarinikatherapie ansprechen [22–25].

Welche Faktoren können nun eine Verbesserung der Symptome der hyperaktiven Blase durch die Bandimplantation verhindern? Hier kommen hauptsächlich infrage: die hypotone Urethra (intrinsic sphincter deficiency – ISD), urodynamisch nachweisbare Detrusorkontraktionen, der präoperativ erhobene Symptom-schweregrad sowie fortgeschrittenes Alter. Letztere 3 wurden als prognostisch ungünstige Risikofaktoren bereits nachgewiesen [26, 27]. Gamble [28] fand noch weitere: Zwei und mehr Nykturieepisodes, eine erniedrigte totale zystometrische Blasenkapazität, höhere Detrusordrücke und niedrigere Blasen volumina beim Auftreten von Detrusorkontraktionen sowie niedrigere Flowraten ( $Q_{max}$ ). Katsumi und Rutman [27] folgern aus ihrer Literaturrecherche, dass transobturatorisch gelegte Bänder bessere Ergebnisse bez. der Wirkung auf die überaktive Harnblase zeigen als retropubische. Zur eindeutigen Bewertung aller dieser Einflussgrößen sind sicher noch weitere Studien nötig.

### Fazit für die Praxis

Nicht nur die Belastungsinkontinenz, sondern auch die oft gleichzeitig bestehenden Symptome der überaktiven Harnblase können durch die Implantation eines suburethralen Bandes statistisch signifikant verbessert werden, wobei dies mehr für Dranginkontinenz und Pollakisurie als für die Nykturie gilt. Die Studie vergleicht den Zustand vor und 3 Monate nach Implantation von TVT-O. Die Lebensqualität steigt signifikant.

### Interessenkonflikt

Nein.

### Literatur

- 1 Abrams P, Andersson KE, Birder L et al. Fourth International Consultation on Incontinence Recommendations of the International Scientific Committee: Evaluation and treatment of urinary incontinence, pelvic organ prolapse, and fecal incontinence. *Neurourol Urodyn* 2010; 29: 213–240
- 2 Dooley Y, Lowenstein L, Kenton K et al. Mixed incontinence is more bothersome than pure incontinence subtypes. *Int Urogynecol J Pelvic Floor Dysfunct* 2008; 19: 1359–1362
- 3 Frick AC, Huang AJ, Van Den Eeden SK et al. Mixed urinary incontinence: greater impact on quality of life. *J Urol* 2009; 182: 596–600
- 4 Cox A, Herschorn S, Lee L. Surgical management of female SUI: is there a gold standard? *Nat Rev Urol* 2013; 10: 78–89
- 5 Tunn R, Hanzal E, Perucchini D, Hrsg. *Urogynäkologie in Praxis und Klinik*. 2. Aufl. Berlin: de Gruyter; 2010: 232
- 6 Kissling J, Westermann L, Agarwala N. Resolution of urge urinary incontinence with midurethral sling surgery in patients with mixed incontinence and lwo-pressure urethra. *Gynecol Surg* 2012; 9: 427–432
- 7 Abdel-fattah M, Mostafa A, Young D et al. Evaluation of transobturator tension-free vaginal tapes in the management of women with mixed urinary incontinence: one-year outcomes. *Am J Obstet Gynecol* 2011; 205: 150e1–150e6
- 8 Jain P, Jirschele K, Botros SM et al. Effectiveness of midurethral slings in mixed urinary incontinence: a systematic review and meta-analysis. *Int Urogynecol J* 2011; 22: 923–932
- 9 Athanasiou S, Grigoriadis T, Giannoulis G et al. Midurethral slings for women with urodynamic mixed incontinence: what to expect? *Int Urogynecol J* 2013; 24: 393–399

- 10 Palva K, Nilsson CG. Prevalence of urinary urgency symptoms decreases by mid-urethral sling procedures for treatment of stress incontinence. *Int Urogynecol J* 2011; 22: 1241–1247
- 11 King A, Rapp ED. Short term urgency outcomes following transobturator midurethral sling placement. *CJU* 2011; 18: 5796–5801
- 12 Yoo EH, Kim D. Predictors of postoperative antimuscarinics in women with mixed urinary incontinence after transobturator surgery. *Int Urogynecol J* 2013; 24: 401–406
- 13 Khullar V. Patient-reported outcomes and different approaches to urinary parameters in overactive bladder: what should we measure? *Int Urogynecol J* 2012; 23: 179–192
- 14 Ghoniem G, Stanford E, Kenton K et al. Evaluation and outcome measures in the treatment of female urinary stress incontinence: International Urogynecological Association (IUGA) guidelines for research and clinical practice. *Int Urogynecol J* 2008; 19: 5–33
- 15 Tunn R, Hanzal E, Perucchini D, Hrsg. *Urogynäkologie in Praxis und Klinik*. 2. Aufl. Berlin: de Gruyter; 2010: 119
- 16 Naumann G, Kölbl H. Current developments and perspectives on the diagnosis and treatment of urinary incontinence and genital prolapse in women. *Geburtsh Frauenheilk* 2012; 72: 202–210
- 17 Cornu JN, Abrams P, Chapple CR et al. A contemporary assessment of nocturia: definition, epidemiology, pathophysiology, and management – a systematic review and metanalysis. *Eur Urol* 2012; 62: 877–890
- 18 Van Kerrebroeck PEV, Dmochowski R, FitzGerald MP et al. Nocturia research: current status and future perspectives. *Neurourol Urodyn* 2010; 29: 623–628
- 19 Murray S, Lemack GE. Overactive bladder and mixed incontinence. *Curr Urol Rep* 2010; 11: 385–392
- 20 Jung SY, Fraser MO, Ozawa H et al. Urethral afferent nerve activity affects the micturition reflex; implication for the relationship between stress incontinence and detrusor instability. *J Urol* 1999; 162: 204–212
- 21 Dmochowski R, Staskin D. Mixed incontinence: definitions, outcomes, and interventions. *Curr Opin Urol* 2005; 15: 374–379
- 22 Koonings P, Bergman A, Ballard CA. Combined detrusor instability and stress urinary incontinence: where is the primary pathology? *Gynecol Obstet Invest* 1988; 26: 250–256
- 23 Wise BG, Cardozo LD, Cutner A et al. Prevalence and significance of urethral instability in women with detrusor instability. *Br J Urol* 1993; 72: 26–29
- 24 Koonings PP, Bergman A. Urethral pressure changes in women with detrusor instability. Bladder or urethral pathologic process? *Urology* 1991; 37: 540–542
- 25 Major H, Culligan P, Heit M. Urethral sphincter morphology in women with detrusor instability. *Obstet Gynecol* 2002; 99: 63–68
- 26 Lee JK, Dwyer PL, Rosamilia A et al. Persistence of urgency and urge urinary incontinence in women with mixed urinary symptoms after mid-urethral slings: a multivariate analysis. *BJOG* 2011; 118: 798–805
- 27 Katsumi HK, Rutman MP. Can we predict if overactive bladder symptoms will resolve after sling surgery in women with mixed urinary incontinence? *Curr Urol Rep* 2010; 11: 328–337
- 28 Gamble TL, Botros SM, Beaumont JL et al. Predictors of persistent detrusor overactivity after transvaginal sling procedures. *Am J Obstet Gynecol* 2008; 199: 696.e1–696.e7
